# Supplementary material
Source: PubMed Central journal article supplement (PMC6384071)
Supplement: JVI.01647-18-s0001.pdf [file JVI.01647-18-s0001.pdf]

**Supplemental Material**

**for**

**The need for speed: run-on oligomer filament formation provides maximum speed with maximum sequestration of activity**

Claudia Barahona, L. Emilia Basantes, Kassidy J. Tompkins, Desirae M. Heitman, Barbara I. Chukwu,  
Juan Sanchez, Jonathan L. Sanchez, Niloofar Ghadirian, Chad K. Park & N. C. Horton\*

**Department of Molecular and Cellular Biology, University of Arizona, Tucson, Arizona 85721**

**Table S1. Western data to quantitate expression levels**

| <b>SgrAI Enzyme</b> | <b>Protein Level (%)<sup>2</sup></b> |
|---------------------|--------------------------------------|
| WT                  | 100%                                 |
| T4D                 | 38%                                  |
| S6D                 | 70%                                  |
| I7E                 | 57%                                  |
| R24E                | 40%                                  |
| N25E                | 30%                                  |
| P27W                | 82%                                  |
| P27G                | 74%                                  |
| Q34D                | 80%                                  |
| I51E                | 75%                                  |
| S56E                | 68%                                  |
| S56Q                | 29%                                  |
| A57E                | 62%                                  |
| A57Q                | 108%                                 |
| I59E                | 59%                                  |
| M62E                | 33%                                  |
| R84E                | 33%                                  |
| R127A               | 100%                                 |
| R131A               | 38%                                  |
| R134A               | 63%                                  |

**Table S2. Calculation of Local Concentration of Sites on Phage DNA**

| Parameter                                                                                   | Number                               | Units          |
|---------------------------------------------------------------------------------------------|--------------------------------------|----------------|
| Estimated molecules SgrAI per cell                                                          | 100                                  | molecules      |
| Molecules phage per cell (at the minimum)                                                   | 1                                    | molecules      |
| size of cell in microns                                                                     | 1                                    | microns        |
| volume of a spherical cell                                                                  | $5 \times 10^{-13}$                  | $\text{cm}^3$  |
|                                                                                             | $5 \times 10^{-16}$                  | L              |
| <b>Concentration of SgrAI in the cell<sup>a</sup></b>                                       | <b><math>3 \times 10^{-7}</math></b> | <b>M</b>       |
|                                                                                             | <b>300</b>                           | <b>nM</b>      |
| <b>Calculation of the concentration of DNA and SgrAI recognition sites in the cell</b>      |                                      |                |
| <b>Concentration of phage DNA in cell</b>                                                   | <b><math>3 \times 10^{-9}</math></b> | <b>M</b>       |
|                                                                                             | <b>3</b>                             | <b>nM</b>      |
| <b>Calculation of the local concentration of sites on the same DNA molecule<sup>b</sup></b> |                                      |                |
| size of phage DNA                                                                           | 50,000                               | bp             |
| Distance between sites on phage (if 5 sites per phage) <sup>c</sup>                         | 8,333                                | bp             |
| Distance in Ångstrom                                                                        | 28,333                               | Å              |
| Radius of gyration                                                                          | 2,173                                | Å              |
| Volume occupied by 2 sites in phage using radius=Rg                                         | $4 \times 10^{10}$                   | Å <sup>3</sup> |
|                                                                                             | $4 \times 10^{-14}$                  | $\text{cm}^3$  |
|                                                                                             | $4 \times 10^{-17}$                  | L              |
| <b>Local concentration of 2 SgrAI/site on phage using Rg</b>                                | <b><math>8 \times 10^{-8}</math></b> | <b>M</b>       |
|                                                                                             | <b>80</b>                            | <b>nM</b>      |

<sup>a</sup>**Calculation of [SgrAI] in the cell:** first, the size of the cell is used to calculate volume, and with 100 molecules of SgrAI estimated, a concentration can be calculated as  $C=100/(\text{Avogadro's number} \times \text{volume of the cell})$ , and is calculated to be 300 nM. With 1 copy of DNA per cell, a similar calculation gives 3 nM.

<sup>b</sup>**To calculate the local concentration of sites on the same phage DNA to each other:** with 3.4 Å/bp, the 8,333 bp distance between sites gives 28,333 Å between sites on linear DNA if fully extended (and in B form). The radius of gyration was calculated according to the equation  $Rg=((2 \times P \times N)/6)^{1/2}$  in Å, P is persistence length (500 Å)<sup>l</sup>, N is the linear distance (in Å) between sites. From this radius, a volume can be calculated ( $V=4/3\pi r^3$ ), and the concentration calculated as 2 molecules (the two DNA bound SgrAI) in a volume (calculated as  $4 \times 10^{-17}$  L), which is ~80 nM.

<sup>c</sup>The number of primary sites will vary with each phage genome, for example,  $\lambda$  phage contains 6 primary sites, though 3 are predicted based on the statistics in a 50,000 kb genome.

Table S3. Equilibria used in simulations of the ROO filament and Binary mechanisms

| Reaction Step                                                                                                                                     | Forward Rate Constant | Reverse Rate Constant |
|---------------------------------------------------------------------------------------------------------------------------------------------------|-----------------------|-----------------------|
| <b>Equations for Run-on Oligomer Filament Mechanism</b>                                                                                           |                       |                       |
| <i>Binding of SgrAI binding to its recognition site in DNA (site) to create the SgrAI/DNA complex R</i>                                           |                       |                       |
| $\text{SgrAI} + \text{site} \rightleftharpoons \mathbf{R}$                                                                                        | $k_1$                 | $k_{-1}$              |
| <i>Self-association of a SgrAI/DNA complexes (i.e. R)</i>                                                                                         |                       |                       |
| $\mathbf{R} + \mathbf{R} \rightleftharpoons \mathbf{RR}$                                                                                          | $k_2$                 | $k_{-2}$              |
| $\mathbf{R} + \mathbf{R} \rightleftharpoons \mathbf{RR}$                                                                                          | $k_2$                 | $k_{-2}$              |
| $\mathbf{RR} + \mathbf{R} \rightleftharpoons \mathbf{RRR}$                                                                                        | $k_2$                 | $k_{-2}$              |
| $\mathbf{R} + \mathbf{RR} \rightleftharpoons \mathbf{RRR}$                                                                                        | $k_2$                 | $k_{-2}$              |
| <i>DNA cleavage within the ROO filament (X denotes SgrAI bound to cleaved DNA)</i>                                                                |                       |                       |
| $\mathbf{RR} \rightleftharpoons \mathbf{XR}$                                                                                                      | $k_3$                 | $k_{-3}$              |
| $\mathbf{RR} \rightleftharpoons \mathbf{RX}$                                                                                                      | $k_3$                 | $k_{-3}$              |
| $\mathbf{XR} \rightleftharpoons \mathbf{XX}$                                                                                                      | $k_3$                 | $k_{-3}$              |
| $\mathbf{RX} \rightleftharpoons \mathbf{XX}$                                                                                                      | $k_3$                 | $k_{-3}$              |
| $\mathbf{RRR} \rightleftharpoons \mathbf{XRR}$                                                                                                    | $k_3$                 | $k_{-3}$              |
| $\mathbf{RRR} \rightleftharpoons \mathbf{RXR}$                                                                                                    | $k_3$                 | $k_{-3}$              |
| $\mathbf{RRR} \rightleftharpoons \mathbf{RRX}$                                                                                                    | $k_3$                 | $k_{-3}$              |
| $\mathbf{XRR} \rightleftharpoons \mathbf{XXR}$                                                                                                    | $k_3$                 | $k_{-3}$              |
| $\mathbf{XRR} \rightleftharpoons \mathbf{XRX}$                                                                                                    | $k_3$                 | $k_{-3}$              |
| $\mathbf{XXR} \rightleftharpoons \mathbf{XXX}$                                                                                                    | $k_3$                 | $k_{-3}$              |
| $\mathbf{XRX} \rightleftharpoons \mathbf{XXX}$                                                                                                    | $k_3$                 | $k_{-3}$              |
| $\mathbf{RXR} \rightleftharpoons \mathbf{XXR}$                                                                                                    | $k_3$                 | $k_{-3}$              |
| $\mathbf{RXR} \rightleftharpoons \mathbf{RXX}$                                                                                                    | $k_3$                 | $k_{-3}$              |
| $\mathbf{XXR} \rightleftharpoons \mathbf{XXX}$                                                                                                    | $k_3$                 | $k_{-3}$              |
| $\mathbf{RXX} \rightleftharpoons \mathbf{XXX}$                                                                                                    | $k_3$                 | $k_{-3}$              |
| $\mathbf{RRX} \rightleftharpoons \mathbf{XRX}$                                                                                                    | $k_3$                 | $k_{-3}$              |
| $\mathbf{RRX} \rightleftharpoons \mathbf{RXX}$                                                                                                    | $k_3$                 | $k_{-3}$              |
| $\mathbf{XRX} \rightleftharpoons \mathbf{XXX}$                                                                                                    | $k_3$                 | $k_{-3}$              |
| $\mathbf{RXX} \rightleftharpoons \mathbf{XXX}$                                                                                                    | $k_3$                 | $k_{-3}$              |
| <i>Dissociation of run-on oligomer filaments that contain some SgrAI/DNA complexes with cleaved DNA (i.e. X) and some with uncleaved (i.e. R)</i> |                       |                       |
| $\mathbf{XR} \rightleftharpoons \mathbf{R} + \mathbf{X}$                                                                                          | $k_{-2}$              | $k_2$                 |
| $\mathbf{RX} \rightleftharpoons \mathbf{R} + \mathbf{X}$                                                                                          | $k_{-2}$              | $k_2$                 |
| $\mathbf{XX} \rightleftharpoons \mathbf{X} + \mathbf{X}$                                                                                          | $k_{-2}$              | $k_2$                 |
| $\mathbf{XRR} \rightleftharpoons \mathbf{X} + \mathbf{RR}$                                                                                        | $k_{-2}$              | $k_2$                 |
| $\mathbf{XRR} \rightleftharpoons \mathbf{XR} + \mathbf{R}$                                                                                        | $k_{-2}$              | $k_2$                 |
| $\mathbf{RXR} \rightleftharpoons \mathbf{R} + \mathbf{XR}$                                                                                        | $k_{-2}$              | $k_2$                 |
| $\mathbf{RXR} \rightleftharpoons \mathbf{RX} + \mathbf{R}$                                                                                        | $k_{-2}$              | $k_2$                 |
| $\mathbf{RRX} \rightleftharpoons \mathbf{R} + \mathbf{RX}$                                                                                        | $k_{-2}$              | $k_2$                 |
| $\mathbf{RRX} \rightleftharpoons \mathbf{RR} + \mathbf{X}$                                                                                        | $k_{-2}$              | $k_2$                 |
| $\mathbf{XXR} \rightleftharpoons \mathbf{X} + \mathbf{XR}$                                                                                        | $k_{-2}$              | $k_2$                 |
| $\mathbf{XXR} \rightleftharpoons \mathbf{XX} + \mathbf{R}$                                                                                        | $k_{-2}$              | $k_2$                 |

|                                                                                                                                          |          |          |
|------------------------------------------------------------------------------------------------------------------------------------------|----------|----------|
| $\text{XRX} \rightleftharpoons \text{X} + \text{RX}$                                                                                     | $k_{-2}$ | $k_2$    |
| $\text{XRX} \rightleftharpoons \text{XR} + \text{X}$                                                                                     | $k_{-2}$ | $k_2$    |
| $\text{RXX} \rightleftharpoons \text{R} + \text{XX}$                                                                                     | $k_{-2}$ | $k_2$    |
| $\text{RXX} \rightleftharpoons \text{RX} + \text{X}$                                                                                     | $k_{-2}$ | $k_2$    |
| $\text{XXX} \rightleftharpoons \text{X} + \text{XX}$                                                                                     | $k_{-2}$ | $k_2$    |
| $\text{XXX} \rightleftharpoons \text{XX} + \text{X}$                                                                                     | $k_{-2}$ | $k_2$    |
| <i>Dissociation of SgrAI/DNA complexes which contain cleaved DNA (i.e. X) to SgrAI and cleaved DNA</i>                                   |          |          |
| $\text{X} \rightleftharpoons \text{SgrAI} + \text{cleaved DNA}$                                                                          | $k_4$    | $k_{-4}$ |
| <b>Equations for Binary Mechanism</b>                                                                                                    |          |          |
| <i>Binding of Binary enzyme E to its recognition site in DNA (site) to create the E/DNA complex R</i>                                    |          |          |
| $\text{E} + \text{site} \rightleftharpoons \text{R}$                                                                                     | $k_1$    | $k_{-1}$ |
| <i>Self-association of a E/DNA complexes (i.e. R)</i>                                                                                    |          |          |
| $\text{R} + \text{R} \rightleftharpoons \text{RR}$                                                                                       | $k_2$    | $k_{-2}$ |
| <i>DNA cleavage within the Binary complex (X denotes enzyme E bound to cleaved DNA)</i>                                                  |          |          |
| $\text{RR} \rightleftharpoons \text{XR}$                                                                                                 | $k_3$    | $k_{-3}$ |
| $\text{RR} \rightleftharpoons \text{RX}$                                                                                                 | $k_3$    | $k_{-3}$ |
| $\text{XR} \rightleftharpoons \text{XX}$                                                                                                 | $k_3$    | $k_{-3}$ |
| $\text{RX} \rightleftharpoons \text{XX}$                                                                                                 | $k_3$    | $k_{-3}$ |
| <i>Dissociation of Binary complexes that contain some E/DNA complexes with cleaved DNA (i.e. X) and some with uncleaved DNA (i.e. R)</i> |          |          |
| $\text{XR} \rightleftharpoons \text{X} + \text{R}$                                                                                       | $k_{-2}$ | $k_2$    |
| $\text{RX} \rightleftharpoons \text{R} + \text{X}$                                                                                       | $k_{-2}$ | $k_2$    |
| $\text{XX} \rightleftharpoons \text{X} + \text{X}$                                                                                       | $k_{-2}$ | $k_2$    |
| <i>Dissociation of E/DNA complexes which contain cleaved DNA (i.e. X) to enzyme E and cleaved DNA</i>                                    |          |          |
| $\text{X} \rightleftharpoons \text{E} + \text{cleaved DNA}$                                                                              | $k_4$    | $k_{-4}$ |

**Table S4. Rate constants using in simulations**

| Reaction                                                                                    | Forward Rate Constant                                 | Reverse Rate Constant                                                                                                                     |
|---------------------------------------------------------------------------------------------|-------------------------------------------------------|-------------------------------------------------------------------------------------------------------------------------------------------|
| DNA recognition site (site) binding by SgrAI (ROO mechanism) or enzyme E (Binary mechanism) | $k_1 = 10^9 \text{ M}^{-1} \text{ s}^{-1}$            | $k_{-1} = 0.06 \text{ s}^{-1}$                                                                                                            |
| Association and self-association of enzyme-substrate (R) and enzyme-product complexes (X)   | $k_2 = 1.3 \times 10^5 \text{ M}^{-1} \text{ s}^{-1}$ | $k_{-2} = 0.03 \text{ s}^{-1}$                                                                                                            |
| DNA cleavage by SgrAI (ROO mechanism) or E (Binary mechanism)                               | $k_3 = 0.8 \text{ s}^{-1}$                            | $k_3 = 0$<br>(considered irreversible)                                                                                                    |
| Product release (release of cleaved DNA from SgrAI or E)                                    | $k_4 = 0.4 \text{ s}^{-1}$                            | $k_{-4} = 3 \times 10^7 \text{ M}^{-1} \text{ s}^{-1}$ (Fig. 3A-B, D)<br>$k_{-4} = 3 \times 10^6 \text{ M}^{-1} \text{ s}^{-1}$ (Fig. 3C) |

Table S5. Equations for simulating reactions with secondary site DNA

| Reaction Step                                                                                                                             | Forward Rate Constant | Reverse Rate Constant |
|-------------------------------------------------------------------------------------------------------------------------------------------|-----------------------|-----------------------|
| <i>SgrAI binding to <b>primary site</b> DNA or <b>secondary site</b> DNA into SgrAI/DNA complexes <b>A</b> and <b>R</b>, respectively</i> |                       |                       |
| <b>SgrAI+PRIMARY</b> $\rightleftharpoons$ <b>P</b>                                                                                        | $k_1$                 | $k_{-1}$              |
| <b>SgrAI+SECONDARY</b> $\rightleftharpoons$ <b>S</b>                                                                                      | $k_2$                 | $k_{-2}$              |
| <i>Self-association of a SgrAI/<b>PRIMARY</b> complex (i.e. <b>P</b>) with another SgrAI/<b>PRIMARY</b> complex (i.e. <b>P</b>)</i>       |                       |                       |
| <b>P + P</b> $\rightleftharpoons$ <b>PP</b>                                                                                               | $k_3$                 | $k_{-3}$              |
| <b>P + P</b> $\rightleftharpoons$ <b>PP</b>                                                                                               | $k_3$                 | $k_{-3}$              |
| <b>SP + P</b> $\rightleftharpoons$ <b>SPP</b>                                                                                             | $k_3$                 | $k_{-3}$              |
| <b>P + PS</b> $\rightleftharpoons$ <b>PPS</b>                                                                                             | $k_3$                 | $k_{-3}$              |
| <b>PP + P</b> $\rightleftharpoons$ <b>PPP</b>                                                                                             | $k_3$                 | $k_{-3}$              |
| <b>P + PP</b> $\rightleftharpoons$ <b>PPP</b>                                                                                             | $k_3$                 | $k_{-3}$              |
| <b>PPP + P</b> $\rightleftharpoons$ <b>PPPP</b>                                                                                           | $k_3$                 | $k_{-3}$              |
| <b>P + PPP</b> $\rightleftharpoons$ <b>PPPP</b>                                                                                           | $k_3$                 | $k_{-3}$              |
| <b>P + PPS</b> $\rightleftharpoons$ <b>PPPS</b>                                                                                           | $k_3$                 | $k_{-3}$              |
| <b>P + PSP</b> $\rightleftharpoons$ <b>PPSP</b>                                                                                           | $k_3$                 | $k_{-3}$              |
| <b>PSP + P</b> $\rightleftharpoons$ <b>PSPP</b>                                                                                           | $k_3$                 | $k_{-3}$              |
| <b>SPP + P</b> $\rightleftharpoons$ <b>SPPP</b>                                                                                           | $k_3$                 | $k_{-3}$              |
| <b>SP+PP</b> $\rightleftharpoons$ <b>SPPP</b>                                                                                             | $k_3$                 | $k_{-3}$              |
| <b>SP+PS</b> $\rightleftharpoons$ <b>SPPS</b>                                                                                             | $k_3$                 | $k_{-3}$              |
| <i>Association of a SgrAI/<b>PRIMARY</b> complex (i.e. <b>P</b>) with a SgrAI/<b>SECONDARY</b> complex (i.e. <b>S</b>)</i>                |                       |                       |
| <b>P + S</b> $\rightleftharpoons$ <b>PS</b>                                                                                               | $k_4$                 | $k_{-4}$              |
| <b>S + P</b> $\rightleftharpoons$ <b>SP</b>                                                                                               | $k_4$                 | $k_{-4}$              |
| <b>PS + P</b> $\rightleftharpoons$ <b>PSP</b>                                                                                             | $k_4$                 | $k_{-4}$              |
| <b>P + SP</b> $\rightleftharpoons$ <b>PSP</b>                                                                                             | $k_4$                 | $k_{-4}$              |
| <b>PP + S</b> $\rightleftharpoons$ <b>PPS</b>                                                                                             | $k_4$                 | $k_{-4}$              |
| <b>S + PP</b> $\rightleftharpoons$ <b>SPP</b>                                                                                             | $k_4$                 | $k_{-4}$              |
| <b>S + PS</b> $\rightleftharpoons$ <b>SPS</b>                                                                                             | $k_4$                 | $k_{-4}$              |
| <b>SP + S</b> $\rightleftharpoons$ <b>SPS</b>                                                                                             | $k_4$                 | $k_{-4}$              |
| <b>S + PPP</b> $\rightleftharpoons$ <b>SPPP</b>                                                                                           | $k_4$                 | $k_{-4}$              |
| <b>S + PPS</b> $\rightleftharpoons$ <b>SPPS</b>                                                                                           | $k_4$                 | $k_{-4}$              |
| <b>SPP + S</b> $\rightleftharpoons$ <b>SPPS</b>                                                                                           | $k_4$                 | $k_{-4}$              |
| <b>S + PSP</b> $\rightleftharpoons$ <b>SPSP</b>                                                                                           | $k_4$                 | $k_{-4}$              |
| <b>SPS + P</b> $\rightleftharpoons$ <b>SPSP</b>                                                                                           | $k_4$                 | $k_{-4}$              |
| <b>P + SPS</b> $\rightleftharpoons$ <b>PSPS</b>                                                                                           | $k_4$                 | $k_{-4}$              |
| <b>PSP + S</b> $\rightleftharpoons$ <b>PSPS</b>                                                                                           | $k_4$                 | $k_{-4}$              |
| <b>PPP + S</b> $\rightleftharpoons$ <b>PPPS</b>                                                                                           | $k_4$                 | $k_{-4}$              |
| <b>PPS + P</b> $\rightleftharpoons$ <b>PPSP</b>                                                                                           | $k_4$                 | $k_{-4}$              |
| <b>P + SPP</b> $\rightleftharpoons$ <b>PSPP</b>                                                                                           | $k_4$                 | $k_{-4}$              |
| <b>PP+SP</b> $\rightleftharpoons$ <b>PPSP</b>                                                                                             | $k_4$                 | $k_{-4}$              |
| <b>PS+PP</b> $\rightleftharpoons$ <b>PSPP</b>                                                                                             | $k_4$                 | $k_{-4}$              |

|                                                                                                                                   |          |          |
|-----------------------------------------------------------------------------------------------------------------------------------|----------|----------|
| $PS+PS \rightleftharpoons PPS$                                                                                                    | $k_4$    | $k_{-4}$ |
| $SP+SP \rightleftharpoons SPSP$                                                                                                   | $k_4$    | $k_{-4}$ |
| $PP+PS \rightleftharpoons PPPS$                                                                                                   | $k_4$    | $k_{-4}$ |
| <i>Cleavage of secondary site DNA within the ROO filament<br/>(S becomes X)</i>                                                   |          |          |
| $PS \rightleftharpoons PX$                                                                                                        | $k_5$    | $k_{-5}$ |
| $SP \rightleftharpoons XP$                                                                                                        | $k_5$    | $k_{-5}$ |
| $PSP \rightleftharpoons PXP$                                                                                                      | $k_5$    | $k_{-5}$ |
| $PPS \rightleftharpoons PPX$                                                                                                      | $k_5$    | $k_{-5}$ |
| $SPP \rightleftharpoons XPP$                                                                                                      | $k_5$    | $k_{-5}$ |
| $SPS \rightleftharpoons XPX$                                                                                                      | $k_5$    | $k_{-5}$ |
| $PPPS \rightleftharpoons PPPX$                                                                                                    | $k_5$    | $k_{-5}$ |
| $PPSP \rightleftharpoons PPXP$                                                                                                    | $k_5$    | $k_{-5}$ |
| $PSPP \rightleftharpoons PXPP$                                                                                                    | $k_5$    | $k_{-5}$ |
| $SPPP \rightleftharpoons XPPP$                                                                                                    | $k_5$    | $k_{-5}$ |
| $PSPS \rightleftharpoons PSPX$                                                                                                    | $k_5$    | $k_{-5}$ |
| $PSPS \rightleftharpoons PXPS$                                                                                                    | $k_5$    | $k_{-5}$ |
| $PXPS \rightleftharpoons PXPX$                                                                                                    | $k_5$    | $k_{-5}$ |
| $PSPX \rightleftharpoons PXPX$                                                                                                    | $k_5$    | $k_{-5}$ |
| $SPPS \rightleftharpoons XPPX$                                                                                                    | $k_5$    | $k_{-5}$ |
| $SPSP \rightleftharpoons XPPX$                                                                                                    | $k_5$    | $k_{-5}$ |
| <i>Dissociation of a SgrAI/PRIMARY complex (i.e. P) with another SgrAI/PRIMARY complex (i.e. P)</i>                               |          |          |
| $XPP \rightleftharpoons XP + P$                                                                                                   | $k_{-3}$ | $k_3$    |
| $PPX \rightleftharpoons P + PX$                                                                                                   | $k_{-3}$ | $k_3$    |
| $PPP \rightleftharpoons PP + P$                                                                                                   | $k_{-3}$ | $k_3$    |
| $PPP \rightleftharpoons P + PP$                                                                                                   | $k_{-3}$ | $k_3$    |
| $PPPX \rightleftharpoons P + PPX$                                                                                                 | $k_{-3}$ | $k_3$    |
| $PPXP \rightleftharpoons P + PXP$                                                                                                 | $k_{-3}$ | $k_3$    |
| $PXPP \rightleftharpoons PXP + P$                                                                                                 | $k_{-3}$ | $k_3$    |
| $XPPP \rightleftharpoons XPP + P$                                                                                                 | $k_{-3}$ | $k_3$    |
| $PPPP \rightleftharpoons PP+PP$                                                                                                   | $k_{-3}$ | $k_3$    |
| $PPPX \rightleftharpoons PP+PX$                                                                                                   | $k_{-3}$ | $k_3$    |
| $XPPP \rightleftharpoons XP+PP$                                                                                                   | $k_{-3}$ | $k_3$    |
| $XPPX \rightleftharpoons XP+PX$                                                                                                   | $k_{-3}$ | $k_3$    |
| <i>Dissociation of SgrAI/SECONDARY complex with cleaved secondary site DNA (i.e. X)<br/>from a SgrAI/PRIMARY complex (i.e. P)</i> |          |          |
| $PX \rightleftharpoons P + X$                                                                                                     | $k_{-4}$ | $k_4$    |
| $SP \rightleftharpoons X + P$                                                                                                     | $k_{-4}$ | $k_4$    |
| $PXP \rightleftharpoons PX + P$                                                                                                   | $k_{-4}$ | $k_4$    |
| $PXP \rightleftharpoons P + XP$                                                                                                   | $k_{-4}$ | $k_4$    |
| $PPX \rightleftharpoons PP + X$                                                                                                   | $k_{-4}$ | $k_4$    |
| $XPP \rightleftharpoons X + PP$                                                                                                   | $k_{-4}$ | $k_4$    |
| $XPS \rightleftharpoons X + PS$                                                                                                   | $k_{-4}$ | $k_4$    |
| $XPS \rightleftharpoons XP + S$                                                                                                   | $k_{-4}$ | $k_4$    |

|                                                                                                                                                                                                                          |          |          |
|--------------------------------------------------------------------------------------------------------------------------------------------------------------------------------------------------------------------------|----------|----------|
| $SPX \rightleftharpoons S + PX$                                                                                                                                                                                          | $k_{-4}$ | $k_4$    |
| $SPX \rightleftharpoons SP + X$                                                                                                                                                                                          | $k_{-4}$ | $k_4$    |
| $XPX \rightleftharpoons X + PX$                                                                                                                                                                                          | $k_{-4}$ | $k_4$    |
| $XPX \rightleftharpoons XP + X$                                                                                                                                                                                          | $k_{-4}$ | $k_4$    |
| $PPPX \rightleftharpoons PPP + X$                                                                                                                                                                                        | $k_{-4}$ | $k_4$    |
| $PPXP \rightleftharpoons PPX + P$                                                                                                                                                                                        | $k_{-4}$ | $k_4$    |
| $PXPP \rightleftharpoons P + XPP$                                                                                                                                                                                        | $k_{-4}$ | $k_4$    |
| $XPPP \rightleftharpoons X + PPP$                                                                                                                                                                                        | $k_{-4}$ | $k_4$    |
| $PXPX \rightleftharpoons P + XPX$                                                                                                                                                                                        | $k_{-4}$ | $k_4$    |
| $PXPX \rightleftharpoons PXP + X$                                                                                                                                                                                        | $k_{-4}$ | $k_4$    |
| $XPPX \rightleftharpoons X + PPX$                                                                                                                                                                                        | $k_{-4}$ | $k_4$    |
| $XPPX \rightleftharpoons XPP + X$                                                                                                                                                                                        | $k_{-4}$ | $k_4$    |
| $XPXP \rightleftharpoons X + PXP$                                                                                                                                                                                        | $k_{-4}$ | $k_4$    |
| $XPXP \rightleftharpoons XPX + P$                                                                                                                                                                                        | $k_{-4}$ | $k_4$    |
| $PSPX \rightleftharpoons P + SPX$                                                                                                                                                                                        | $k_{-4}$ | $k_4$    |
| $PSPX \rightleftharpoons PSP + X$                                                                                                                                                                                        | $k_{-4}$ | $k_4$    |
| $PXPS \rightleftharpoons P + XPS$                                                                                                                                                                                        | $k_{-4}$ | $k_4$    |
| $PXPS \rightleftharpoons PXP + S$                                                                                                                                                                                        | $k_{-4}$ | $k_4$    |
| $SPPX \rightleftharpoons S + PPX$                                                                                                                                                                                        | $k_{-4}$ | $k_4$    |
| $SPPX \rightleftharpoons SPP + X$                                                                                                                                                                                        | $k_{-4}$ | $k_4$    |
| $XPPS \rightleftharpoons X + PPS$                                                                                                                                                                                        | $k_{-4}$ | $k_4$    |
| $XPPS \rightleftharpoons XPP + S$                                                                                                                                                                                        | $k_{-4}$ | $k_4$    |
| $SPXP \rightleftharpoons S + PXP$                                                                                                                                                                                        | $k_{-4}$ | $k_4$    |
| $SPXP \rightleftharpoons SPX + P$                                                                                                                                                                                        | $k_{-4}$ | $k_4$    |
| $XPSP \rightleftharpoons X + PSP$                                                                                                                                                                                        | $k_{-4}$ | $k_4$    |
| $XPSP \rightleftharpoons XPS + P$                                                                                                                                                                                        | $k_{-4}$ | $k_4$    |
| $PPXP \rightleftharpoons PP + XP$                                                                                                                                                                                        | $k_{-4}$ | $k_4$    |
| $PXPP \rightleftharpoons PX + PP$                                                                                                                                                                                        | $k_{-4}$ | $k_4$    |
| $PXPX \rightleftharpoons PX + PX$                                                                                                                                                                                        | $k_{-4}$ | $k_4$    |
| $XPXP \rightleftharpoons XP + XP$                                                                                                                                                                                        | $k_{-4}$ | $k_4$    |
| <i>Dissociation of cleaved <b>SECONDARY</b> site DNA from SgrAI</i>                                                                                                                                                      |          |          |
| $X \rightleftharpoons SgrAI + \text{SECONDARY}^{\text{cleaved}}$                                                                                                                                                         | $k_6$    | $k_{-6}$ |
| <b>Binary Mechanism</b>                                                                                                                                                                                                  |          |          |
| <i>Binding of <b>PRIMARY</b> and <b>SECONDARY</b> site DNA to enzyme (E) to give complexes <b>P</b> and <b>S</b>, respectively</i>                                                                                       |          |          |
| $E + \text{PRIMARY} \rightleftharpoons P$                                                                                                                                                                                | $k_1$    | $k_{-1}$ |
| $E + \text{SECONDARY} \rightleftharpoons S$                                                                                                                                                                              | $k_2$    | $k_{-2}$ |
| <i>Association of two enzyme-substrate complexes-enzyme bound to primary (<b>P</b>) may self-associate, or associate with enzyme bound to secondary (<b>S</b>) but enzyme bound to secondary does not self-associate</i> |          |          |
| $P + P \rightleftharpoons PP$                                                                                                                                                                                            | $k_3$    | $k_{-3}$ |
| $P + S \rightleftharpoons PS$                                                                                                                                                                                            | $k_4$    | $k_{-4}$ |
| <i>Conversion of substrate to product (<b>S</b> complexes only)</i>                                                                                                                                                      |          |          |
| $PS \rightleftharpoons PX$                                                                                                                                                                                               | $k_5$    | $k_{-5}$ |
| <i>Dissociation of Binary complex with cleaved <b>SECONDARY</b> site DNA</i>                                                                                                                                             |          |          |

|                                                                          |          |          |
|--------------------------------------------------------------------------|----------|----------|
| $PX \rightleftharpoons P + X$                                            | $k_{-4}$ | $k_4$    |
| <i>Dissociation of cleaved <b>SECONDARY</b> site DNA from enzyme (E)</i> |          |          |
| $X \rightleftharpoons E + \text{SECONDARY}^{\text{cleaved}}$             | $k_6$    | $k_{-6}$ |

**Table S6. Rate Constants used in simulating secondary site cleavage (equations of Table S5)**

| Reaction                                                                                                                                                                                                  | Forward Rate Constant                                                                                                                                                                                                      | Reverse Rate Constant                         |
|-----------------------------------------------------------------------------------------------------------------------------------------------------------------------------------------------------------|----------------------------------------------------------------------------------------------------------------------------------------------------------------------------------------------------------------------------|-----------------------------------------------|
| Binding of <b>SgrAI</b> (ROO filament mechanism) or enzyme <b>E</b> (Binary mechanism) to <b>PRIMARY</b> site DNA                                                                                         | $k_1 = 10^8 \text{ M}^{-1}\text{s}^{-1}$                                                                                                                                                                                   | $k_{-1} = 0.006 \text{ s}^{-1}$               |
| Binding of <b>SgrAI</b> (ROO mechanism) or enzyme <b>E</b> (Binary mechanism) to <b>SECONDARY</b> site DNA                                                                                                | $k_2 = 10^8 \text{ M}^{-1}\text{s}^{-1}$                                                                                                                                                                                   | $k_{-2} = 0.06 \text{ s}^{-1}$                |
| Association of two <b>SgrAI</b> or two enzyme <b>E</b> complexes containing <b>PRIMARY</b> site DNA ( <b>P</b> )                                                                                          | ROO:<br>$k_3 = 1.3 \times 10^5 \text{ M}^{-1}\text{s}^{-1}$<br>Binary:<br>$k_3 = 1.3 \times 10^5 \text{ M}^{-1}\text{s}^{-1}$ ( <b>Fig. 5A</b> )<br>$k_3 = 6.0 \times 10^5 \text{ M}^{-1}\text{s}^{-1}$ ( <b>Fig. 5B</b> ) | $k_{-3} = 0.03 \text{ s}^{-1}$                |
| Association of enzyme-DNA complexes where one contains <b>PRIMARY</b> site DNA ( <b>P</b> ) and the other contains <b>SECONDARY</b> site DNA, cleaved or uncleaved ( <b>S</b> or <b>X</b> , respectively) | ROO:<br>$k_4 = 6.5 \times 10^4 \text{ M}^{-1}\text{s}^{-1}$<br>Binary:<br>$k_4 = 6.5 \times 10^4 \text{ M}^{-1}\text{s}^{-1}$ ( <b>Fig. 5A</b> )<br>$k_4 = 3.0 \times 10^5 \text{ M}^{-1}\text{s}^{-1}$ ( <b>Fig. 5B</b> ) | $k_{-4} = 0.03 \text{ s}^{-1}$                |
| Cleavage of <b>SECONDARY</b> site DNA within complex                                                                                                                                                      | $k_5 = 0.8 \text{ s}^{-1}$                                                                                                                                                                                                 | $k_{-5} = 0$<br>(set to 0 to be irreversible) |
| Dissociation of cleaved <b>SECONDARY</b> site DNA from <b>SgrAI</b> (ROO) or enzyme <b>E</b> (Binary)                                                                                                     | $k_6 = 0.4 \text{ s}^{-1}$                                                                                                                                                                                                 | $k_{-6} = 0$<br>(set to 0 to be irreversible) |



**Table S7. Initial Concentrations used in the simulation of secondary site cleavage (see Tables S5-S6)**

| <b>Species</b>    | <b>Initial Concentration (nM)</b>               |
|-------------------|-------------------------------------------------|
| <b>SgrAI or E</b> | 4000<br>(excess to ensure complete DNA binding) |
| <b>PRIMARY</b>    | 3 (dotted lines) or<br>1000 (solid lines)       |
| <b>SECONDARY</b>  | 3 (dotted lines) or<br>1000 (solid lines)       |

[1] Rippe, K., von Hippel, P. H., and Langowski, J. (1995) Action at a distance: DNA-looping and initiation of transcription, *Trends in biochemical sciences* 20, 500-506.
